# Supplementary material for: Loneliness among family medicine providers and its impact on clinical and teaching practice
Source: Springer Nature journal article supplement (doi:10.1038/s41598-025-00688-x), 2025-05-08
Supplement: MOESM1 [file 41598_2025_688_MOESM1_ESM.pdf]

## 2024 CERA General Membership Survey

### 3. Is Social Isolation and Loneliness Considered an Important Topic?

First, in general, how do you feel about different aspects of your own life:

1. How often do you feel that you lack companionship?

- ☐ Hardly ever
- ☐ Sometimes
- ☐ Often

2. How often do you feel left out?

- ☐ Hardly ever
- ☐ Sometimes
- ☐ Often

3. How often do you feel isolated from others?

- ☐ Hardly ever
- ☐ Sometimes
- ☐ Often

Second, we want to understand how these topics impact your work and role as a clinician and/or educator:

4. How important do you perceive loneliness and social isolation as a topic in family medicine?

- ☐ Not important
- ☐ Slightly important
- ☐ Moderately important
- ☐ Important
- ☐ Very important

5. How often do you specifically discuss lack of companionship, feeling left out, or feeling isolated with your patients?

- ☐ Never
- ☐ Rarely
- ☐ Sometimes
- ☐ Often
- ☐ Always
- ☐ Does not apply - I am not directly seeing patients

6. How much do you agree with this statement?

Family medicine clinicians should regularly *screen for and assess* social isolation in patients.

- ☐ Strongly disagree
- ☐ Disagree
- ☐ Undecided
- ☐ Agree
- ☐ Strongly agree

7. How much do you agree with this statement?

Family medicine clinicians are responsible for *addressing and managing* their patients' social isolation.

- ☐ Strongly disagree
- ☐ Disagree
- ☐ Undecided
- ☐ Agree
- ☐ Strongly agree

8. How would you describe your practice's dedicated internal resources to address loneliness among patients?

- ☐ Absent
- ☐ Inadequate
- ☐ Adequate
- ☐ I don't know
- ☐ N/A

9. How often does your clinic practice partner with external community programs focused on helping people experiencing loneliness or social isolation?

- ☐ Never
- ☐ Rarely
- ☐ Sometimes
- ☐ Often
- ☐ Always
- ☐ I don't know
- ☐ N/A

10. How often do you teach about or discuss loneliness and social isolation with your family medicine students and/or residents?

- ☐ Never
- ☐ Rarely
- ☐ Sometimes
- ☐ Often
- ☐ Always
- ☐ Does not apply - I am not directly teaching/ precepting
